# 1 Predicting the time course of replacements 2 of SARS-CoV-2 variants using relative 3 reproduction numbers

4  
5 Chayada Piantham<sup>1</sup> and Kimihito Ito<sup>2\*</sup>

6 <sup>1</sup>*Graduate School of Infectious Diseases, Hokkaido University; [chayada@czc.hokudai.ac.jp](mailto:chayada@czc.hokudai.ac.jp)*

7 <sup>2</sup>*International Institute for Zoonosis Control, Hokkaido University; [itok@czc.hokudai.ac.jp](mailto:itok@czc.hokudai.ac.jp)*

## 8 Abstract

9 The severe acute respiratory syndrome coronavirus 2 (SARS-CoV-2) has continuously evolved  
10 since its introduction to the human population in 2019. Natural selection selects variants with  
11 higher effective reproduction numbers, increasing the overall transmissibility of the circulating  
12 viruses. In order to establish effective control measures for a new variant, it is crucial to know its  
13 transmissibility and replacement time course in early phases of the variant replacement. In this  
14 paper, we conduct retrospective prediction tests of the variant replacement from Alpha to Delta  
15 in England. Our method firstly estimated the relative reproduction number, the ratio of the  
16 reproduction number of a variant to that of another, from partial observations up to a given time  
17 point. Secondly, the replacement time course after the time point was predicted based on the  
18 estimates of relative reproduction number. Thirdly, the estimated relative reproduction number  
19 and the predicted time course were evaluated by being compared to those estimated using the  
20 entire observations. We found that it is possible to estimate the relative reproduction number of  
21 Delta with respect to Alpha when the frequency of Delta was more than or equal to 0.25. Using  
22 these relative reproduction numbers, predictions targeting on 1<sup>st</sup> June 2021, the date when the  
23 frequency of Delta reached 0.90, had maximum absolute prediction errors of 0.015 for  
24 frequencies of Delta and 0.067 for the average relative reproduction number of circulating  
25 viruses with respect to Alpha. These results suggest that our method allows us to predict the time  
26 course of variant replacement in future from partial datasets observed in early phases of variant  
27 replacement.

28

29 **Keywords:** SARS-CoV-2, relative reproduction number, Delta, Alpha, variant replacement

## 30 Introduction

31 Since its first emergence in the human population in 2019, the severe acute respiratory syndrome  
32 coronavirus 2 (SARS-CoV-2) has been generating new variants. Natural selection selects new  
33 variants that has higher effective reproduction numbers than other circulating variants. As a  
34 result, the average transmissibility in the viral population increases over time [1]. As of date,  
35 Alpha (B.1.1.7), Beta (B.1.351), Gamma (P.1), Delta (B.1.617.2), and Omicron (B.1.1.529) have  
36 been assigned as variants of concern (VOCs) because of their increased transmissibility  
37 compared to previous variants [2].

38

39 It is important to know how transmissible the new variants are compared to previously  
40 circulating variants because the average reproduction number of the circulating virus changes  
41 when new variants become dominant. Several studies have analyzed the reproduction numbers of  
42 new variants that have replaced old ones. Volz et al. estimated the effective reproduction number  
43 of Alpha in England to be 1.5–2.0 times higher than that of non-VOCs using a logistic growth  
44 model for variant frequencies [3]. Leung et al. estimated the basic reproduction number of Alpha  
45 to be 1.75 times higher than that of previously circulating variants in England using a renewal-  
46 equation-based model [4]. Ito et al. estimated the effective reproduction number of Delta to be  
47 1.35 times higher than that of Alpha from variant frequencies observed in Japan by using an  
48 approximated version of the renewal-equation-based model [5]. Using the same method, Ito et al.  
49 estimated the effective reproduction number of Omicron to be 3.15 times higher than that of  
50 Delta in Denmark [6], and Nishiura et al. estimated the effective reproduction of Omicron to be  
51 4.2 times higher than that of Delta in South Africa [7].

52

53 In order to prepare control measures against new variants, it is crucial to predict the time course  
54 of the variant replacements in advance. The prediction of variant selection has been widely  
55 studied in seasonal influenza viruses [8]. Łuksza and Lässig developed a fitness model using  
56 mutations on epitopes and non-epitopes to predict selected variants [9]. Huddleston et al.  
57 predicted the future frequency of variants using its current frequency, the antigenic novelty of

58 epitopes, and the mutational load in non-epitopes [10]. Piantham and Ito modeled the fixation  
59 probability of variants using variant frequency and statistics on patient ages [11]. In the case of  
60 seasonal influenza, the main driving force of natural selection was the population immunity  
61 acquired from previous infections. In contrast, most of the human population are considered  
62 naïve to SARS-CoV-2 infections, and a new method to predict the time course of variant  
63 replacement of SARS-CoV-2 needs to be developed.

64  
65 The transmissibility of an infectious agent can be measured by its reproduction number. The  
66 effective reproduction number at time  $t$  ( $R_t$ ) is defined as the average number of people  
67 someone infected at time  $t$  could expect to produce if conditions should remain unchanged  
68 [12]. When more than one variant of the infectious agent is circulating, the relative reproduction  
69 number can be used to measure the relative transmissibility of a variant compared to a baseline  
70 variant [4,13]. However, the method requires the number of new cases in addition to the  
71 frequencies of variants, and it is not applicable for predicting future time course of variant  
72 replacement. Using approximations, Ito et al. proposed a method to determine the relative  
73 reproduction number without knowing the number of new cases [5]. This method allows us to  
74 predict the future time course of variant replacements.

75  
76 Nucleotide sequences of SARS-CoV-2 variants collected worldwide have been submitted to and  
77 accumulated on the GISAID database [14]. It is known that different geographical locations have  
78 different distributions of variants [15]. As of 28<sup>th</sup> February 2022, a total of 8,753,735 sequences  
79 have been registered on the database worldwide. Of these, 1,786,080 (20%) were submitted from  
80 England, which has their population account for 0.71% of the world population. These numbers  
81 indicate that England is one of the locations having highest sequencing capacity. In England, the  
82 Alpha–Delta replacement was observed from March 2021 to June 2021. The sequence  
83 information during the Alpha–Delta replacement in England is one of the best datasets to  
84 evaluate the predictability of variant replacement in SARS-CoV-2.

85  
86 In this study, we conduct retrospective prediction tests using the nucleotide sequences collected  
87 in England during the Alpha–Delta replacement. For each given time point, we use partial  
88 sequence data observed only up to that time point to estimate the relative reproduction number of

89 Delta with respect to (w.r.t.) Alpha. The estimated relative reproduction number is then used to  
90 predict the future time course of variant replacement. The estimated relative reproduction  
91 numbers and the predicted time courses are evaluated by being compared to those estimated  
92 using the entire dataset.

## 93 Materials and Methods

### 94 Nucleotide sequences

95 Nucleotide sequences of SARS-CoV-2 viruses collected from England during 1<sup>st</sup> January 2021 to  
96 31<sup>st</sup> July 2021 were downloaded from the GISAID database on 16<sup>th</sup> November 2021 [14]. Of  
97 these, 411,123 sequences had complete information about date of sample collection in the  
98 metadata. The PANGO lineage names [16] of these sequences were collected from metadata and  
99 recorded with their collection dates (Supplementary Table S1). Sequences that are labeled as  
100 “B.1.1.7” or sublineage names starting with “Q.” were classified as the Alpha variant. Sequences  
101 that are labeled as “B.1.617.2” or sublineage names starting with “AY.” were classified as the  
102 Delta variant. There were 11,773 sequences of lineages other than Alpha and Delta, and these  
103 were ignored in subsequent analyses. A total of 399,350 sequences of Alpha (192,250) and Delta  
104 (207,100) were used for counting the daily numbers of sequences belonging to Alpha and Delta  
105 (Supplementary Fig. S1).

### 106 Model of Advantageous Selection

107 We estimated the relative reproduction number of a variant w.r.t. a baseline variant using an  
108 approximated version of the renewal-equation-based model [5], which is based on Fraser’s time-  
109 since-infection model [12]. Briefly, suppose the viral population consisted of only variant  $X$  at  
110 time  $t_0$ . Variant  $Y$  was introduced into the population at calendar time  $t_Y > t_0$  with an initial  
111 frequency of  $q_Y(t_Y)$ . Note that  $q_Y(t) = 0$  for  $t_0 \leq t < t_Y$ . The date of variant introduction,  $t_Y$ ,  
112 was set to the first date when more than one sequence of that variant was counted. We assume  
113 the effective reproduction number of variant  $Y$  was  $k$  times higher than that of variant  $X$ . Let  
114  $f(\tau)$  be the probability mass function of generation time  $\tau$ . We assume  $f(\tau)$  follows the gamma  
115 distribution with a shape parameter of 3.42 and a scale parameter of 1.36 [17]. We discretize

116  $f(\tau)$  to  $g(j) = \int_j^{j+1} f(\tau)d\tau$  for  $1 \leq j \leq 20$ . We truncate the generation time distributions at  $\tau =$   
 117 1 and  $\tau = 20$  by adding  $\int_0^1 f(\tau)d\tau$  to  $g(1)$  and  $\int_{21}^{\infty} f(\tau)d\tau$  to  $g(20)$  so that  $\sum_{j=1}^{20} g(j) = 1$ . Let  
 118  $I(t)$  be the total number of new infections by either  $X$  or  $Y$  at calendar time  $t$ , the effective  
 119 reproduction numbers of variant  $X$  and  $Y$  can be calculated as

$$120 \quad R_X(t) = \frac{q_X(t)I(t)}{\sum_{j=1}^{20} g(j)q_X(t-j)I(t-j)} \quad (1)$$

$$121 \quad R_Y(t) = \frac{q_Y(t)I(t)}{\sum_{j=1}^{20} g(j)q_Y(t-j)I(t-j)}. \quad (2)$$

122 Since the effective reproduction number of variant  $Y$  is  $k$  times higher than that of variant  $X$ , the  
 123 effective reproduction number of variant  $Y$  at time  $t$  is given by

$$124 \quad R_Y(t) = kR_X(t). \quad (3)$$

125 Assuming that the viral population at time  $t$  comprises of only variants  $X$  and  $Y$ , the frequency of  
 126 variant  $Y$  at calendar time  $t$ ,  $q_Y(t)$ , can be calculated as

$$127 \quad q_Y(t) = \frac{q_Y(t)I(t)}{q_X(t)I(t) + q_Y(t)I(t)}. \quad (4)$$

128 We assume that the numbers of new infections do not vary greatly for 20 days, i.e.

$$129 \quad I(t-1) \cong \dots \cong I(t-20) \quad (5)$$

130 for  $t > t_0$ . Using this approximation with Equations (1), (2), and (3), we can rewrite Equation  
 131 (4) using  $q_Y(t-j)$  for  $1 \leq j \leq 20$  as

$$132 \quad q_Y(t) = \frac{k \sum_{j=1}^{20} g(j)q_Y(t-j)}{\sum_{j=1}^{20} g(j)q_X(t-j) + k \sum_{j=1}^{20} g(j)q_Y(t-j)}. \quad (6)$$

133 The average relative reproduction number of circulating viruses at time  $t$  w.r.t. variant  $X$  is given  
 134 by

$$135 \quad q_X(t) + kq_Y(t). \quad (7)$$

## 136 Parameter estimation from the number of sequences

137 Let  $N_X(t)$  and  $N_Y(t)$  be the number of sequences of variant  $X$  and  $Y$  observed at calendar time  $t$ ,  
 138 respectively. Suppose that variant  $Y$  is sampled and sequenced following a beta-binomial  
 139 distribution having distribution parameters of  $\alpha = q_Y(t)M$  and  $\beta = (1 - q_Y(t))M$ . Note that  
 140 this beta-binomial distribution has a mean of  $(N_X(t) + N_Y(t))q_Y(t)$  and a variance of

141  $\frac{(N_X(t)+N_Y(t)q_X(t)q_Y(t)(N_X(t)+N_Y(t)+M)}{M+1}$ . The beta-binomial distribution becomes the binomial  
142 distribution when  $M = \infty$ . The following equation gives the likelihood function of parameters  $k$ ,  
143  $q_Y(t_Y)$ , and  $M$  for observing  $N_X(t)$  and  $N_Y(t)$  sequences of variant  $X$  and  $Y$  at calendar time  $t$ :

$$144 \quad L(k, q_Y(t_Y), M; N_X(t), N_Y(t)) = \binom{N_X(t) + N_Y(t)}{N_Y(t)} \frac{B(N_Y(t) + \alpha, N_X(t) + \beta)}{B(\alpha, \beta)} \quad (8)$$

145 where  $\alpha = q_Y(t)M$ ,  $\beta = (1 - q_Y(t))M$ , and  $B(x, y) = \frac{\Gamma(x)\Gamma(y)}{\Gamma(x+y)}$ .

146  
147 The likelihood for observing  $N_Y(t)$  sequences of variant  $Y$  during the period on calendar times  
148  $t_1, \dots, t_n$  is given by the product of the above formula for  $1 \leq t \leq n$ . The estimates of  $k$ ,  $q_Y(t_Y)$ ,  
149 and  $M$  were obtained by maximizing the likelihood function using observed numbers of  
150 sequences in England from  $t = t_Y$  until the latest  $t$  in which  $q_Y(t) < 1$ . The 95% confidence  
151 intervals (95% CI) of parameters were determined using the profile likelihood method [18].  
152 From the maximum likelihood estimates of  $k$  and  $q_Y(t)$ , the average relative reproduction  
153 number of circulating viruses w.r.t. Alpha at time  $t$  was estimated from Equation (7).

## 154 Prediction of variant frequency and average relative reproduction 155 number

156 Frequencies of Delta and average relative reproduction numbers of circulating viruses w.r.t.  
157 Alpha in future were predicted using the maximum likelihood estimates of parameters calculated  
158 from early observations. First, we estimated  $k$ ,  $q_Y(t_Y)$ , and  $M$  using all observations of  $N_X(t)$   
159 and  $N_Y(t)$  for  $t_Y \leq t \leq t_n$  where  $t_n$  is the latest calendar time  $t$  such that  $q_Y(t) < 1$ , by  
160 maximizing likelihood of products of Equation (8). Using the maximum likelihood estimates  
161 and their 95% CIs, we determined the calendar times  $t$  when the estimated frequency  $q_Y(t)$   
162 exceeded 0.05, 0.10, 0.15, 0.20, 0.25, 0.30, 0.35, 0.40, 0.45, 0.50, 0.55, 0.60, 0.65, 0.70, 0.75,  
163 0.80, 0.85, 0.90, and 0.95. For each date  $t$  determined above, we calculated the maximum  
164 likelihood estimates of  $k$ ,  $q_Y(t_Y)$ , and  $M$  using observations no later than  $t$ . Frequencies of Delta  
165 and average relative reproduction numbers of circulating viruses w.r.t. Alpha in future were  
166 predicted by substituting  $k$  and  $q_Y(t_Y)$  in Equations (6) and (7), respectively.

## 167 Results

### 168 Estimation of relative reproduction number from entire observations

169 Parameters of the model were estimated using the entire observations from 18<sup>th</sup> March to 4<sup>th</sup> July  
170 2021 in England (Table 1). The relative reproduction number ( $k$ ) of Delta w.r.t. Alpha was  
171 estimated to be 1.67 (95% CI: 1.64, 1.67) with a beta-binomial distribution parameter ( $M$ ) of  
172 286.82 (95% CI: 201.83, 403.22).

173  
174 Figure 1a shows the observed and estimated frequencies of Delta during the Alpha–Delta  
175 replacement in England. The blue curve and black dots around the blue curve represent the  
176 maximum likelihood estimates and 95% CI of frequencies of Delta. The gray area represents  
177 95% equal-tailed intervals of the beta distribution with the parameters  $q_Y(t)$  and  $M$  in the 95%  
178 CI. Figure 1b shows the maximum likelihood estimations and 95% CI of the average relative  
179 reproduction number of circulating viruses w.r.t. Alpha during the same period. Dashed vertical  
180 lines in both panels indicate the dates when frequencies of Delta exceeded each 0.05 increment  
181 from 0.05 to 0.95 (Table 2). It took 48 days for Delta to reach from frequencies of 0.05 to 0.95.

### 182 Estimation of relative reproduction number from partial observations

183 Table 3 shows the parameters of our model estimated using the partial data collected no later  
184 than each maximum likelihood date in Table 2. The maximum likelihood estimate of  $k$  using  
185 observations of the entire period in the Alpha–Delta replacement was 1.67 (Table 1). We call this  
186 estimate the ‘final estimate’. The final estimate was within 95% CIs of estimations in six (0.15,  
187 0.25, 0.30, 0.35, 0.40, and 0.45) out of nine estimations using the partial observations before  
188 Delta reached frequencies of 0.50. Three early estimations made at frequencies of 0.05, 0.10, and  
189 0.20 failed to cover the final estimate of  $k$  in their 95% CIs. The five estimations made at  
190 frequencies greater than or equal to 0.25 covered the final estimate of  $k$  in their 95% CIs. This  
191 implied that it was possible to accurately estimate the relative reproduction number of Delta  
192 w.r.t. Alpha when frequencies of Delta became 0.25 or later. It took 34 days for Delta to reach a  
193 frequency of 0.95 from when it was 0.25 (Table 2). Therefore, we would be able to estimate the  
194 relative reproduction number of Delta w.r.t. Alpha more than one month before its fixation. The

195 estimated values of  $M$  also became steady at around 300.00 at frequencies greater than or equal  
196 to 0.25 (Table 3).

## 197 Prediction of variant frequency and average relative reproduction 198 number

199 We conducted retrospective prediction tests on the future frequency of Delta and the average  
200 relative reproduction number of circulating viruses w.r.t. Alpha using model parameters in Table  
201 3, which were estimated from partial observations. Figure 2 shows predicted trajectories of the  
202 Alpha–Delta replacement using partial observations up to different time points in Table 2. The  
203 maximum likelihood predictions made at frequencies of 0.05, 0.10, and 0.20 overestimated the  
204 future frequencies of Delta (Figures 2a–b, 2d), while predictions made at frequencies greater  
205 than or equal to 0.25 fitted well with future observations (Figures 2e–i).

206



207 According to the final estimate using the entire observations, Delta exceeded frequencies of 0.50,  
208 0.70, and 0.90 on 13<sup>th</sup> May, 20<sup>th</sup> May, and 1<sup>st</sup> June 2021, respectively (Table 2). We evaluated  
209 the accuracy of predictions by analyzing predictions targeted on these dates (Figure 3). As the  
210 relative reproduction numbers were overestimated when predictions were made before  
211 frequencies of Delta reached 0.25, the frequencies of Delta on the target dates were also  
212 overestimated in these predictions (Figure 3a–c). In contrast, predictions made when frequencies  
213 of Delta were greater than or equal to 0.25 were close to the final estimate of frequency using  
214 entire observations. When frequencies of Delta were below 0.25, the predictions targeted on 13<sup>th</sup>  
215 May, 20<sup>th</sup> May, and 1<sup>st</sup> June 2021 had median errors of 0.074, 0.069, and 0.036 with maximum  
216 absolute errors of 0.143, 0.121, and 0.055, respectively (Table 4). When frequencies of Delta  
217 were greater than or equal to 0.25, the predictions targeted on 13<sup>th</sup> May, 20<sup>th</sup> May, and 1<sup>st</sup> June  
218 2021 had median errors of 0.018, 0.011, and 0.000 with maximum absolute errors of 0.023,  
219 0.023, and 0.015, respectively (Table 5). Predictions made when frequencies of Delta were  
220 greater than or equal to 0.25 have significantly smaller prediction errors than those made when  
221 frequencies of Delta were less than 0.25 (*p*-values of 0.016, 0.003, and 0.001 using two-sided  
222 Wilcoxon rank sum test for predictions targeted on 13<sup>th</sup> May, 20<sup>th</sup> May, and 1<sup>st</sup> June 2021,  
223 respectively).

224  
225 From the final estimate using entire observations, the average relative reproduction numbers of  
226 circulating viruses w.r.t. Alpha on 13<sup>th</sup> May, 20<sup>th</sup> May, and 1<sup>st</sup> June 2021 were estimated to be  
227 1.34, 1.47, and 1.60, respectively (Table 2). In the same way as the frequency of Delta, the  
228 average relative reproduction numbers of circulating viruses w.r.t. Alpha on the target dates were  
229 overestimated when predictions were made before frequencies of Delta reached 0.25 (Figure 3d–  
230 f). When the frequencies of Delta were below 0.25, predictions targeted on 13<sup>th</sup> May, 20<sup>th</sup> May,  
231 and 1<sup>st</sup> June 2021 had median prediction errors of 0.088, 0.098, and 0.086 and maximum  
232 absolute errors of 0.168, 0.173, and 0.143, respectively (Table 4). When frequencies of Delta  
233 were greater than or equal to 0.25, predictions targeted on 13<sup>th</sup> May, 20<sup>th</sup> May, and 1<sup>st</sup> June 2021  
234 had median errors of 0.014, 0.010, and –0.019 with maximum absolute errors of 0.023, 0.044,  
235 and 0.067, respectively (Table 5). Predictions made when frequencies of Delta were greater than  
236 or equal to 0.25 have significantly smaller prediction errors than those made when frequencies of

237 Delta were less than 0.25 ( $p$ -values of 0.016, 0.003, and 0.001 using two-sided Wilcoxon rank  
238 sum test for predictions targeted on 13<sup>th</sup> May, 20<sup>th</sup> May, and 1<sup>st</sup> June 2021, respectively).  
239

## 240 Discussion

241 We analyzed the replacement from the Alpha variant to the Delta variant in England using  
242 nucleotide sequences on the GISAID database collected between 1<sup>st</sup> January 2021 to 31<sup>st</sup> July  
243 2021. The estimated relative reproduction number,  $k$ , of Delta w.r.t. Alpha was 1.67 (95% CI:  
244 1.64–1.67) with a beta-binomial distribution parameter ( $M$ ) of 286.82 (95% CI: 201.83–403.22)  
245 (Table 1). The relative reproduction number was accurately estimated from early observations  
246 once frequencies of Delta reached 0.25 (Table 3). Using these relative reproduction numbers,  
247 predictions targeting on 1<sup>st</sup> June 2021, the date when the frequency of Delta reached 0.90, had  
248 maximum absolute prediction errors of 0.015 for frequencies of Delta and 0.067 for the average  
249 relative reproduction number of circulating viruses with respect to Alpha (Table 5).

250  
251 Several studies have estimated the relative reproduction of Delta w.r.t. Alpha. Ito et al. estimated  
252 the relative reproduction number of Delta w.r.t. Alpha in Japan to be 1.35 [5]. Hansen estimated  
253 the relative reproduction number of Delta w.r.t. Alpha in Denmark to be 2.17 [19]. In this study,  
254 the relative reproduction number of Delta w.r.t. Alpha was estimated to be 1.67 (95% CI: 1.64–  
255 1.67) (Table 1). Figgins and Bedford found that the relative reproduction number of Delta and  
256 Alpha w.r.t. non-VOC variants in the United States were different depending on the states [20].  
257 The differences in relative reproduction numbers of Delta w.r.t. Alpha among countries or states  
258 may be attributed to the differences in the vaccine usage or the ethnicity of the target  
259 populations.

260  
261 Our model assumes that the sequences on GISAID database was sampled following a beta-  
262 binomial distribution. We could use the binomial distribution in the model instead of the beta-  
263 binomial distribution. The model using beta-binomial distribution resulted in lower Akaike  
264 information criteria (AIC) compared to the model using only binomial distribution  
265 (Supplementary Table S2). This means that the observed variance was larger than the variance of  
266 the binomial distribution. The additional variance to the binomial distribution might be attributed

267 to the difference between variant frequencies among subpopulations. For example, different  
268 regions may show different progresses in the variant replacement. The same may be true for  
269 different age groups. The lower AIC in the beta-binomial distribution model may mean that the  
270 target population was not well-mixed.

271  
272 When a new variant having higher effective reproduction number than the circulating variants  
273 emerges, the new variant will be selected by the natural selection. As a result, the average  
274 relative reproduction number of the circulating viruses w.r.t. old variants increases. Our  
275 retrospective prediction tests show that the average relative reproduction number of circulating  
276 viruses w.r.t. Alpha were accurately predicted when observed frequencies of Delta exceeded  
277 0.25. However, some predictions made at higher frequencies (0.55, 0.70, 0.75, and 0.85) were  
278 slightly lower than the final estimation using entire observations (Figure 3e–f). One possible  
279 reason for these is the relaxation of lockdown restrictions from 17<sup>th</sup> May 2021. Assuming that  
280 variant replacement occurs earlier and sampling is more dense in the city area than countryside,  
281 the relaxation of lockdown restrictions mixed viral population in both areas, making the  
282 observations of Alpha in city area more than expected.

283  
284 Prediction tests conducted in this study did not consider delay in sequence submissions. To  
285 simulate real-time predictions with submission delays, we conducted the same analysis using  
286 observations that were submitted no later than the day of prediction. The results were not as good  
287 as the analysis which assumed that there was no submission delay (Supplementary Fig. S2).  
288 Even if predictions were made when frequencies of Delta were greater than or equal to 0.25, the  
289 frequencies of Delta were overestimated with maximum absolute errors of 0.084, 0.080, and  
290 0.041 for the predictions targeted on 13<sup>th</sup> May, 20<sup>th</sup> May, and 1<sup>st</sup> June 2021, respectively  
291 (Supplementary Table S3). The maximum absolute errors of average relative reproduction  
292 number of circulating viruses w.r.t. Alpha targeting the same dates were 0.101, 0.113, and 0.099,  
293 respectively (Supplementary Table S3). The possible reason for these overestimations is the  
294 difference in submission delay between Delta and Alpha sequences. The submission delay of  
295 nucleotide sequences belonging to Alpha had a mean of 11.05 days and a median of 10 days  
296 during the period from the introduction of Delta (18<sup>th</sup> March 2021) to the date when Delta  
297 reached a frequency of 0.50 (13<sup>th</sup> May 2021). The submission delay of Delta during the same

298 period had a mean of 10.44 days and a median of 9 days. This means that sequences of Delta  
299 were submitted to the GISAID database more quickly than those of Alpha during the early stages  
300 of the Alpha–Delta replacement. Sequencing prioritizing a new variant may have led to the  
301 overestimations, and is the limitation of our real-time prediction using sequence databases. An  
302 explicit inclusion of submission delays for each variant in the model may solve this problem for  
303 real-time predictions. Use of data sources without variant prioritization, such as results of PCR  
304 tests, can also solve this problem.

305  
306 Our model assumes that there was no difference between the generation times of both variants  
307 with a mean value of 4.64 days [17]. However, Hart et al. estimated the generation time of Delta  
308 (4.7 days) to be shorter than that of Alpha (5.5 days) [21]. To allow differences between  
309 generation times of variants, it is necessary to extend the model to also estimate the relative  
310 generation times of the variant w.r.t. that of the baseline variant [22].

## 311 References

- 312
- 313 1 Tao, K. *et al.* The biological and clinical significance of emerging SARS-CoV-2 variants. *Nat*  
314 *Rev Genet* **22**, 757-773, doi:10.1038/s41576-021-00408-x (2021).
  - 315 2 World Health Organization. *Tracking SARS-CoV-2 variants*,  
316 <<https://www.who.int/en/activities/tracking-SARS-CoV-2-variants/>> (2022).
  - 317 3 Volz, E. *et al.* Assessing transmissibility of SARS-CoV-2 lineage B.1.1.7 in England. *Nature*  
318 **593**, 266-269, doi:10.1038/s41586-021-03470-x (2021).
  - 319 4 Leung, K., Shum, M. H., Leung, G. M., Lam, T. T. & Wu, J. T. Early transmissibility assessment  
320 of the N501Y mutant strains of SARS-CoV-2 in the United Kingdom, October to November  
321 2020. *Euro Surveill* **26**, doi:10.2807/1560-7917.ES.2020.26.1.2002106 (2021).
  - 322 5 Ito, K., Piantham, C. & Nishiura, H. Predicted dominance of variant Delta of SARS-CoV-2  
323 before Tokyo Olympic Games, Japan, July 2021. *Euro Surveill* **26**, doi:10.2807/1560-  
324 7917.ES.2021.26.27.2100570 (2021).
  - 325 6 Ito, K., Piantham, C. & Nishiura, H. Relative instantaneous reproduction number of Omicron  
326 SARS-CoV-2 variant with respect to the Delta variant in Denmark. *J Med Virol*,  
327 doi:10.1002/jmv.27560 (2021).
  - 328 7 Nishiura, H. *et al.* Relative reproduction number of SARS-CoV-2 Omicron (B.1.1.529) compared  
329 with Delta variant in South Africa. *J Clin Med* **11**, doi:10.3390/jcm11010030 (2021).
  - 330 8 Morris, D. H. *et al.* Predictive modeling of influenza shows the promise of applied evolutionary  
331 biology. *Trends Microbiol* **26**, 102-118, doi:10.1016/j.tim.2017.09.004 (2018).
  - 332 9 Łuksza, M. & Lässig, M. A predictive fitness model for influenza. *Nature* **507**, 57-61,  
333 doi:10.1038/nature13087 (2014).
  - 334 10 Huddleston, J. *et al.* Integrating genotypes and phenotypes improves long-term forecasts of  
335 seasonal influenza A/H3N2 evolution. *Elife* **9**, doi:10.7554/eLife.60067 (2020).

- 336 11 Piantham, C. & Ito, K. Modeling the selective advantage of new amino acids on the  
337 hemagglutinin of H1N1 influenza viruses using their patient age distributions. *Virus Evolution* **7**,  
338 doi:10.1093/ve/veab049 (2021).
- 339 12 Fraser, C. Estimating individual and household reproduction numbers in an emerging epidemic.  
340 *PLoS One* **2**, e758, doi:10.1371/journal.pone.0000758 (2007).
- 341 13 Leung, K., Lipsitch, M., Yuen, K. Y. & Wu, J. T. Monitoring the fitness of antiviral-resistant  
342 influenza strains during an epidemic: a mathematical modelling study. *Lancet Infect Dis* **17**, 339-  
343 347, doi:10.1016/S1473-3099(16)30465-0 (2017).
- 344 14 Shu, Y. & McCauley, J. GISAID: Global initiative on sharing all influenza data - from vision to  
345 reality. *Euro Surveill* **22**, doi:10.2807/1560-7917.ES.2017.22.13.30494 (2017).
- 346 15 Hadfield, J. *et al.* Nextstrain: real-time tracking of pathogen evolution. *Bioinformatics* **34**, 4121-  
347 4123, doi:10.1093/bioinformatics/bty407 (2018).
- 348 16 Rambaut, A. *et al.* A dynamic nomenclature proposal for SARS-CoV-2 lineages to assist genomic  
349 epidemiology. *Nat Microbiol* **5**, 1403-1407, doi:10.1038/s41564-020-0770-5 (2020).
- 350 17 Nishiura, H., Linton, N. M. & Akhmetzhanov, A. R. Serial interval of novel coronavirus  
351 (COVID-19) infections. *Int J Infect Dis* **93**, 284-286, doi:10.1016/j.ijid.2020.02.060 (2020).
- 352 18 Pawitan, Y. *In all likelihood: Statistical modelling and inference using likelihood.* (Oxford  
353 University Press, 2001).
- 354 19 Hansen, P. R. Relative contagiousness of emerging virus variants: An analysis of the Alpha,  
355 Delta, and Omicron SARS-CoV-2 variants. *The Econometrics Journal*, doi:10.1093/ectj/utac011  
356 (2022).
- 357 20 Figgins, M. D. & Bedford, T. SARS-CoV-2 variant dynamics across US states show consistent  
358 differences in effective reproduction numbers. *medRxiv*, 2021.2012.2009.21267544,  
359 doi:10.1101/2021.12.09.21267544 (2021).
- 360 21 Hart, W. S. *et al.* Generation time of the alpha and delta SARS-CoV-2 variants: an  
361 epidemiological analysis. *Lancet Infect Dis*, doi:10.1016/S1473-3099(22)00001-9 (2022).
- 362 22 Ito, K., Piantham, C. & Nishiura, H. Estimating relative generation times and relative  
363 reproduction numbers of Omicron BA.1 and BA.2 with respect to Delta in Denmark. *medRxiv*,  
364 2022.2003.2002.22271767, doi:10.1101/2022.03.02.22271767 (2022).
- 365

## 366 Acknowledgement

367 We gratefully acknowledge the laboratories responsible for obtaining the specimens and the  
368 laboratories where genetic sequence data were generated and shared via the GISAID Initiative,  
369 on which this research is based. The information on originating laboratories, submitting  
370 laboratories, and authors of SARS-CoV-2 sequence data can be found in Supplementary Table  
371 S1. We thank Brad Suchoski, Heidi Gurung, and Prasith Baccam from IEM, Inc. in the United  
372 States of America for their help converting our R program into the Julia language, which  
373 produced an approximate 50x speedup of our computations. This work was supported by the  
374 Japan Agency for Medical Research and Development (grant numbers JP20fk0108535,  
375 JP21wm0125008). K.I. received funding JSPS KAKENHI (21H03490). C.P. was supported by  
376 the World-leading Innovative and Smart Education Program (1801) from the Ministry of

377 Education, Culture, Sports, Science, and Technology, Japan. The funders had no role in the study  
378 design, data collection and analysis, decision to publish, or preparation of the manuscript.

### 379 Author contributions

380 K.I. designed the study. C.P. collected data and conducted the analysis. C.P. and K.I. wrote the  
381 paper.

### 382 Data availability

383 Supplementary Table S1 contains metadata of all nucleotide sequences of SARS-CoV-2 viruses  
384 collected from England during 1<sup>st</sup> January 2021 to 31<sup>st</sup> July 2021 used for the analysis.

### 385 Conflict of interest

386 We declare that there is no conflict of interest.

### 387 Figures

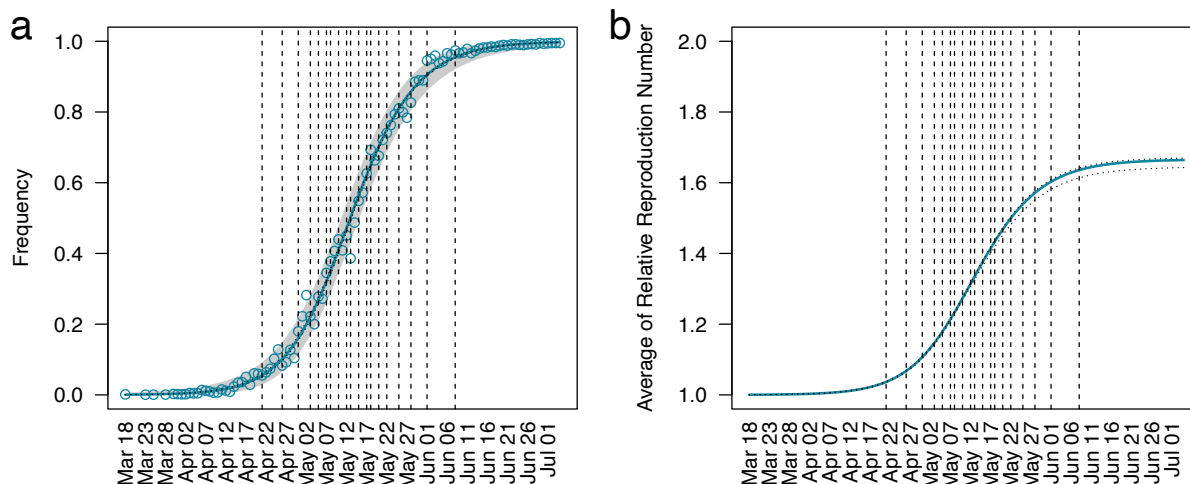

388  
389 **Figure 1. Estimated frequencies of the Delta variant and average relative reproduction**  
390 **number of circulating viruses w.r.t. Alpha during 18<sup>th</sup> March to 4<sup>th</sup> July 2021 using entire**  
391 **observations.** In panel a, circles represent variant frequencies observed in the GISAID database.  
392 The blue curve represents the maximum likelihood estimates of frequencies of Delta. Black  
393 dotted curves around the blue curve represent 95% confidence intervals of the estimated  
394 frequencies of Delta. Gray area represents the 95% equal-tailed interval of beta distribution for

395 the 95% confidence intervals of parameters of the estimated beta-binomial distribution. In panel  
396 **b**, the blue curve and black dotted curves represents the maximum likelihood estimates and 95%  
397 confidence intervals of the average relative reproduction number of circulating viruses with  
398 respect to Alpha. Vertical dashed lines in both panels indicate the dates when the estimated  
399 frequency reached 0.05, 0.10, 0.15, 0.20, 0.25, 0.30, 0.35, 0.40, 0.45, 0.50, 0.55, 0.60, 0.65, 0.70,  
400 0.75, 0.80, 0.85, 0.90, and 0.95.  
401

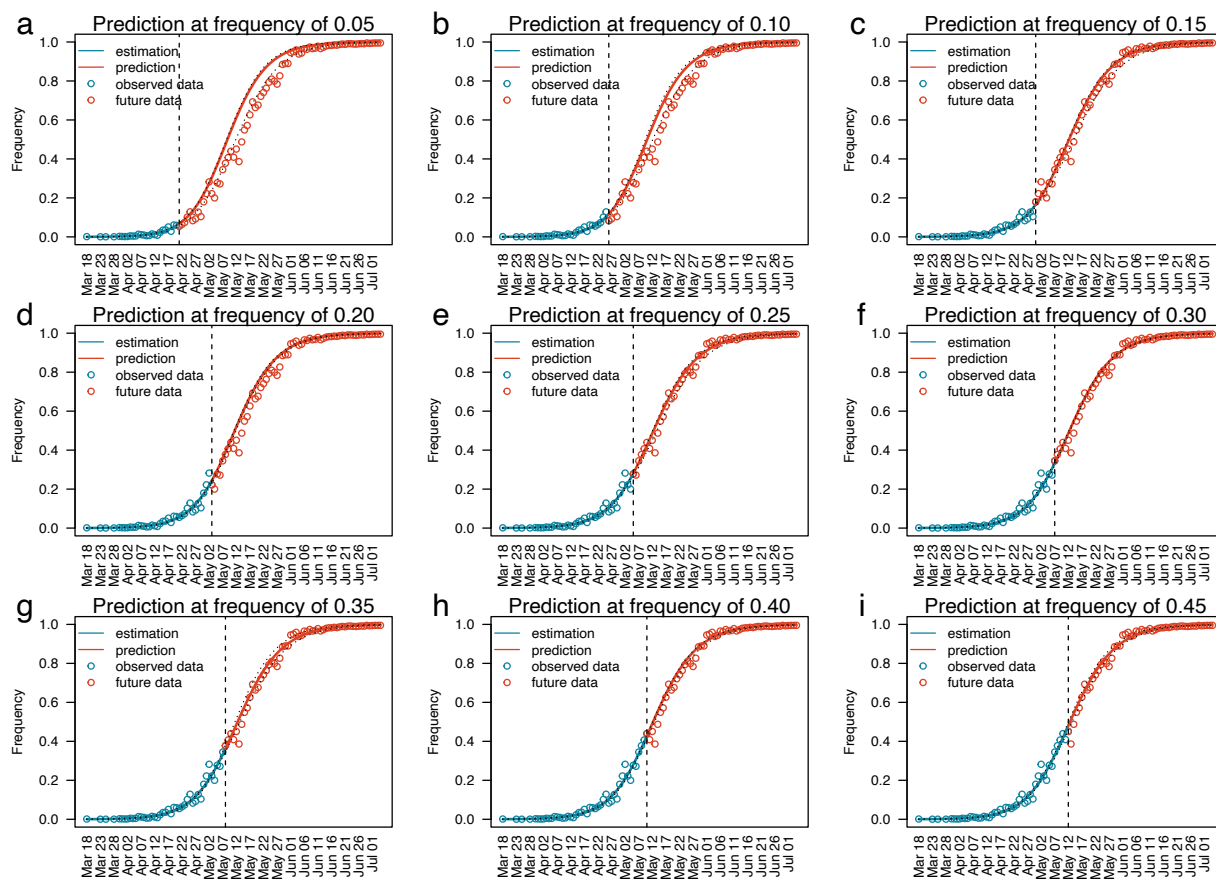

402  
403 **Figure 2. Prediction of future frequencies of the Delta variant using partial observations.**  
404 Panels **a, b, c, d, e, f, g, h,** and **i** represent predictions estimated using observations until 21<sup>st</sup>  
405 April, 26<sup>th</sup> April, 30<sup>th</sup> April, 3<sup>rd</sup> May, 5<sup>th</sup> May, 7<sup>th</sup> May, 8<sup>th</sup> May, 10<sup>th</sup> May, and 12<sup>th</sup> May, 2021,  
406 respectively. Blue circles represent observed frequencies used for predictions. Red circles  
407 represent future observations that were not used for predictions. The blue curve in each panel  
408 represents the maximum likelihood estimates of frequencies, and the red curve represents the  
409 frequencies predicted using the estimated parameter. Black dotted curves represent 95%

410 confidence intervals of the estimated frequencies of Delta. The vertical dashed line in each panel  
411 represents the date of the last observations used for prediction.  
412

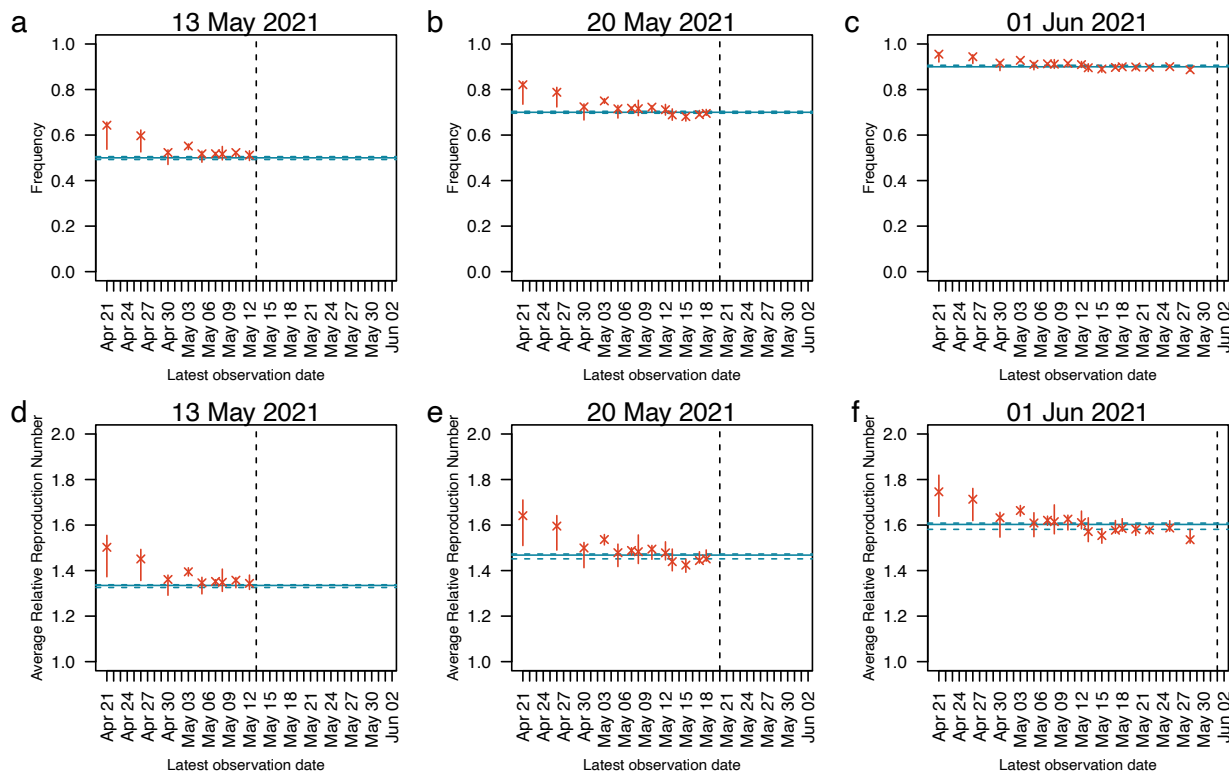

413  
414 **Figure 3. Predictions of population average of relative reproduction number with respect**  
415 **to Alpha.** In each panel, x-axis represents dates until which observations were used in the  
416 prediction. Y-axis represents the predicted population average of reproduction number for the  
417 date marked by vertical dashed lines (13<sup>th</sup> May in **a**, 20<sup>th</sup> May in **b**, and 1<sup>st</sup> June in **c**). Cross  
418 marks represent predicted population average of relative reproduction number with respect to  
419 Alpha and vertical bars represent their 95% confidence intervals. The blue horizontal solid lines  
420 represent the maximum likelihood estimates using the entire observations, we call the final  
421 estimates. The horizontal dashed blue lines represent 95% confidence intervals of the final  
422 estimates.

423



424 **Tables**

425 **Table 1. Parameters estimated using the entire observations during the Alpha–Delta**  
 426 **replacement**

| $k$ (95% CI)      | $q_Y(t_Y)$ (95% CI)     | $M$ (95% CI)            | Log Likelihood |
|-------------------|-------------------------|-------------------------|----------------|
| 1.67 (1.64, 1.67) | 0.0005 (0.0004, 0.0006) | 286.82 (201.83, 403.22) | −430.97        |

427

428 **Table 2. Maximum likelihood estimations for dates when Delta exceeded certain**  
 429 **frequencies and the average relative reproduction numbers w.r.t. Alpha on those dates.**

| Frequency | Date when exceeded the frequency (95% CI) | Average relative reproduction number w.r.t. Alpha (95% CI) |
|-----------|-------------------------------------------|------------------------------------------------------------|
| 0.05      | 2021-04-21 (2021-04-20, 2021-04-21)       | 1.037 (1.035, 1.039)                                       |
| 0.10      | 2021-04-26 (2021-04-26, 2021-04-27)       | 1.068 (1.065, 1.070)                                       |
| 0.15      | 2021-04-30 (2021-04-29, 2021-04-30)       | 1.107 (1.103, 1.109)                                       |
| 0.20      | 2021-05-03 (2021-05-02, 2021-05-03)       | 1.147 (1.142, 1.147)                                       |
| 0.25      | 2021-05-05 (2021-05-04, 2021-05-05)       | 1.179 (1.174, 1.180)                                       |
| 0.30      | 2021-05-07 (2021-05-06, 2021-05-07)       | 1.214 (1.209, 1.216)                                       |
| 0.35      | 2021-05-08 (2021-05-08, 2021-05-09)       | 1.233 (1.228, 1.235)                                       |
| 0.40      | 2021-05-10 (2021-05-10, 2021-05-11)       | 1.273 (1.267, 1.275)                                       |
| 0.45      | 2021-05-12 (2021-05-12, 2021-05-12)       | 1.314 (1.306, 1.317)                                       |
| 0.50      | 2021-05-13 (2021-05-13, 2021-05-14)       | 1.335 (1.326, 1.338)                                       |
| 0.55      | 2021-05-15 (2021-05-15, 2021-05-15)       | 1.376 (1.364, 1.379)                                       |
| 0.60      | 2021-05-17 (2021-05-17, 2021-05-17)       | 1.415 (1.401, 1.419)                                       |
| 0.65      | 2021-05-18 (2021-05-18, 2021-05-19)       | 1.433 (1.419, 1.438)                                       |
| 0.70      | 2021-05-20 (2021-05-20, 2021-05-21)       | 1.468 (1.452, 1.473)                                       |
| 0.75      | 2021-05-22 (2021-05-22, 2021-05-23)       | 1.499 (1.481, 1.505)                                       |
| 0.80      | 2021-05-25 (2021-05-25, 2021-05-25)       | 1.539 (1.520, 1.545)                                       |
| 0.85      | 2021-05-28 (2021-05-28, 2021-05-28)       | 1.571 (1.550, 1.577)                                       |
| 0.90      | 2021-06-01 (2021-06-01, 2021-06-01)       | 1.603 (1.581, 1.609)                                       |
| 0.95      | 2021-06-08 (2021-06-07, 2021-06-08)       | 1.636 (1.614, 1.642)                                       |

430

431 **Table 3. Parameters estimated using partial observations**

| Observed frequency | $k$               | $q_0$                   | $M$                                    | Log Likelihood |
|--------------------|-------------------|-------------------------|----------------------------------------|----------------|
| 0.05               | 1.78 (1.69, 1.85) | 0.0003 (0.0002, 0.0004) | 611.41 (268.84, 2000.00 <sup>†</sup> ) | -82.09         |
| 0.10               | 1.76 (1.68, 1.80) | 0.0003 (0.0002, 0.0004) | 559.33 (264.55, 1476.99)               | -102.85        |
| 0.15               | 1.69 (1.62, 1.71) | 0.0004 (0.0003, 0.0006) | 395.63 (202.88, 842.16)                | -123.12        |
| 0.20               | 1.72 (1.69, 1.73) | 0.0003 (0.0003, 0.0004) | 359.75 (189.17, 725.97)                | -137.61        |
| 0.25               | 1.67 (1.62, 1.71) | 0.0005 (0.0003, 0.0007) | 283.92 (160.53, 603.44)                | -148.98        |
| 0.30               | 1.68 (1.66, 1.70) | 0.0004 (0.0003, 0.0005) | 313.07 (171.38, 579.86)                | -157.87        |
| 0.35               | 1.67 (1.63, 1.74) | 0.0004 (0.0003, 0.0006) | 311.65 (175.27, 602.30)                | -161.95        |
| 0.40               | 1.68 (1.64, 1.70) | 0.0004 (0.0004, 0.0006) | 335.32 (189.19, 637.92)                | -170.37        |
| 0.45               | 1.67 (1.65, 1.72) | 0.0004 (0.0003, 0.0005) | 319.57 (181.41, 575.63)                | -180.60        |
| 0.50               | 1.64 (1.60, 1.69) | 0.0006 (0.0004, 0.0008) | 230.02 (137.25, 411.11)                | -190.09        |
| 0.55               | 1.62 (1.59, 1.65) | 0.0007 (0.0005, 0.0008) | 218.52 (133.36, 439.22)                | -199.09        |
| 0.60               | 1.64 (1.63, 1.68) | 0.0005 (0.0004, 0.0006) | 254.02 (150.72, 429.33)                | -207.23        |
| 0.65               | 1.65 (1.64, 1.69) | 0.0005 (0.0004, 0.0006) | 245.72 (148.15, 413.85)                | -213.00        |
| 0.70               | 1.65 (1.63, 1.67) | 0.0005 (0.0004, 0.0006) | 256.17 (154.91, 426.78)                | -222.19        |
| 0.75               | 1.64 (1.63, 1.66) | 0.0005 (0.0005, 0.0007) | 264.58 (162.71, 451.18)                | -230.71        |
| 0.80               | 1.65 (1.64, 1.68) | 0.0005 (0.0004, 0.0006) | 291.69 (177.99, 484.83)                | -244.13        |
| 0.85               | 1.60 (1.59, 1.65) | 0.0008 (0.0005, 0.0009) | 202.38 (119.43, 612.16)                | -264.29        |
| 0.90               | 1.65 (1.63, 1.67) | 0.0005 (0.0004, 0.0006) | 236.54 (155.20, 372.12)                | -284.01        |
| 0.95               | 1.66 (1.65, 1.68) | 0.0005 (0.0004, 0.0006) | 201.41 (138.15, 306.96)                | -328.33        |

432 †The upper bound of  $M$  in the maximum likelihood estimation was set to 2,000.

433

434 **Table 4. Errors of predictions made at frequencies less than 0.25**

| Target date               | Number of predictions | Errors in predicted frequency |                        | Errors in predicted average relative reproduction number |                        |
|---------------------------|-----------------------|-------------------------------|------------------------|----------------------------------------------------------|------------------------|
|                           |                       | Median                        | Maximum absolute error | Median                                                   | Maximum absolute error |
| 13 <sup>th</sup> May 2021 | 4                     | 0.074                         | 0.143                  | 0.088                                                    | 0.168                  |
| 20 <sup>th</sup> May 2021 | 4                     | 0.069                         | 0.121                  | 0.098                                                    | 0.173                  |
| 1 <sup>st</sup> June 2021 | 4                     | 0.036                         | 0.055                  | 0.086                                                    | 0.143                  |

435

436 **Table 5. Errors of predictions made at frequencies greater than or equal to 0.25**

| Target date               | Number of predictions | Errors in predicted frequency |                        | Errors in predicted average relative reproduction number |                        |
|---------------------------|-----------------------|-------------------------------|------------------------|----------------------------------------------------------|------------------------|
|                           |                       | Median                        | Maximum absolute error | Median                                                   | Maximum absolute error |
| 13 <sup>th</sup> May 2021 | 5                     | 0.018                         | 0.023                  | 0.014                                                    | 0.023                  |
| 20 <sup>th</sup> May 2021 | 9                     | 0.011                         | 0.023                  | 0.010                                                    | 0.044                  |
| 1 <sup>st</sup> June 2021 | 13                    | 0.000                         | 0.015                  | -0.019                                                   | 0.067                  |

437

438
